# Supplementary material
Source: publisher site journal article supplement (https://www.spandidos-publications.com/3130/downloadSupplementary)
Supplement: Supplementary file 1 [file downloadSupplementary]

## Sheet: Sheet1
Table SXI. Gene Ontology analysis of the DEmRNAs involved in the differentially expressed long non-coding RNA-DEmRNA co-expression network.
Category	Term	Count	%	P-value	Genes	List Total	Pop Hits	Pop Total	Fold Enrichment	Bonferroni	Benjamini	False discovery rate
GOTERM_BP_DIRECT	GO:0055114~oxidation-reduction process	17	0.0750154	0.00033153	PTGS2, CYP11A1, CYP2F4, GLUD1, CMAH, UGDH, HR, DHRS9, AKR1B8, AKR1B7, FMO6, CYP26B1, MPO, ALOX5, NQO1, CYP2C11, ADH6A	162	651	17535	2.82656	0.288848	0.288848	0.524359
GOTERM_BP_DIRECT	GO:0006955~immune response	9	0.0397141	0.0033002	RT1-CE16, CD40LG, PRG4, RT1-DB1, RT1-CE10, VTN, RT1-DMA, RT1-BA, RT1-A3	162	267	17535	3.64856	0.966567	0.817153	5.10624
GOTERM_BP_DIRECT	GO:0002504~antigen processing and presentation of peptide or polysaccharide antigen via MHC class II	3	0.013238	0.00436403	RT1-DB1, RT1-DMA, RT1-BA	162	11	17535	29.5202	0.988847	0.776575	6.69948
GOTERM_BP_DIRECT	GO:0019430~removal of superoxide radicals	3	0.013238	0.00611489	APOA4, MPO, NQO1	162	13	17535	24.9786	0.998174	0.793272	9.26719
GOTERM_BP_DIRECT	GO:0042573~retinoic acid metabolic process	3	0.013238	0.00923939	LRAT, CYP26B1, DHRS9	162	16	17535	20.2951	0.999928	0.85169	13.6857
GOTERM_BP_DIRECT	GO:0043200~response to amino acid	4	0.0176507	0.0162142	GSTM1, CYP11A1, CTGF, MMP3	162	58	17535	7.46488	1	0.939239	22.8322
GOTERM_BP_DIRECT	GO:0007018~microtubule-based movement	4	0.0176507	0.0210418	KIFC1, KIF2C, DNAH9, KIF20B	162	64	17535	6.76505	1	0.95598	28.6223
GOTERM_BP_DIRECT	GO:0042493~response to drug	11	0.0485394	0.0240618	GSTM1, CDKN1A, RET, PLIN2, CYP11A1, PTGS2, AK1, NPPC, ABCC2, ASL, LCT	162	528	17535	2.25502	1	0.956271	32.0347
GOTERM_BP_DIRECT	GO:0021549~cerebellum development	4	0.0176507	0.0256023	SSTR2, CYP11A1, AK1, GLUD1	162	69	17535	6.27483	1	0.948307	33.7159
GOTERM_BP_DIRECT	GO:0007568~aging	8	0.0353014	0.0264763	RETN, CTGF, FOXG1, MPO, IGFBP1, NQO1, ELAVL4, ASL	162	315	17535	2.74897	1	0.93661	34.6523
GOTERM_BP_DIRECT	GO:0034341~response to interferon-gamma	3	0.013238	0.0289235	RT1-DB1, RT1-BA, CITED1	162	29	17535	11.1973	1	0.935616	37.2088
GOTERM_BP_DIRECT	GO:0032467~positive regulation of cytokinesis	3	0.013238	0.0367321	CDC6, RXFP3, KIF20B	162	33	17535	9.84007	1	0.95948	44.7535
GOTERM_BP_DIRECT	GO:0042572~retinol metabolic process	3	0.013238	0.0367321	AKR1B8, LRAT, PLB1	162	33	17535	9.84007	1	0.95948	44.7535
GOTERM_BP_DIRECT	GO:0007584~response to nutrient	5	0.0220634	0.0376119	CYP11A1, ALOX5, NQO1, ASL, LCT	162	137	17535	3.95039	1	0.951762	45.5481
GOTERM_BP_DIRECT	GO:0050873~brown fat cell differentiation	3	0.013238	0.0387972	PTGS2, EBF2, UCP1	162	34	17535	9.55065	1	0.945282	46.6018
GOTERM_BP_DIRECT	GO:0014070~response to organic cyclic compound	7	0.0308887	0.0397908	CDKN1A, PLIN2, CYP11A1, HRH3, PTGS2, CTGF, NQO1	162	272	17535	2.78561	1	0.938131	47.4703
GOTERM_BP_DIRECT	GO:0002474~antigen processing and presentation of peptide antigen via MHC class I	3	0.013238	0.0430564	RT1-CE16, RT1-CE10, RT1-A3	162	36	17535	9.02006	1	0.940851	50.2323
GOTERM_BP_DIRECT	GO:0071385~cellular response to glucocorticoid stimulus	3	0.013238	0.0430564	SSTR2, RT1-BA, ASL	162	36	17535	9.02006	1	0.940851	50.2323
GOTERM_BP_DIRECT	GO:0006629~lipid metabolic process	4	0.0176507	0.0486725	ENPP6, PLB1, SULT1D1, THRSP	162	89	17535	4.86475	1	0.951067	54.6668
GOTERM_BP_DIRECT	GO:0042130~negative regulation of T cell proliferation	3	0.013238	0.0497529	RT1-DB1, RT1-BA, CEACAM1	162	39	17535	8.32621	1	0.945772	55.4763
GOTERM_CC_DIRECT	GO:0031090~organelle membrane	6	0.026476	0.00122812	FMO6, PTGS2, CYP2F4, CYP26B1, DHRS9, CYP2C11	165	90	18520	7.48283	0.200409	0.200409	1.50502
GOTERM_CC_DIRECT	GO:0005615~extracellular space	23	0.101491	0.00295301	CTHRC1, PRG4, RT1-DB1, VTN, PDE4C, MMP3, GDNF, LYZL1, APOA4, CBLN4, RETN, CTGF, FGB, CD40LG, PPP1R1A, NPPC, CSTB, MPO, IGFBP1, ALOX5, CFD, APLN, CEACAM1	165	1316	18520	1.96168	0.416227	0.23595	3.58368
GOTERM_CC_DIRECT	GO:0005829~cytosol	26	0.11473	0.00344811	CPLX1, CNDP1, UCHL1, UGDH, RUNDC3A, ASL, MMP3, CITED1, ANXA8, MOAP1, PLIN2, MAT1A, PPP1R1B, PLIN1, CTGF, ACOT12, MT1, CAMK2B, NQO1, SHC3, THRSP, CAR13, ELAVL4, AKR1B8, CDKN1A, ALOX5	165	1590	18520	1.83541	0.466684	0.189048	4.17283
GOTERM_CC_DIRECT	GO:0042613~MHC class II protein complex	3	0.013238	0.00661375	RT1-DB1, RT1-DMA, RT1-BA	165	14	18520	24.0519	0.701116	0.260607	7.86232
GOTERM_CC_DIRECT	GO:0051233~spindle midzone	3	0.013238	0.0120733	CDC6, KIF20B, CAMK2B	165	19	18520	17.7225	0.890377	0.357342	13.9201
GOTERM_CC_DIRECT	GO:0042612~MHC class I protein complex	3	0.013238	0.0174551	RT1-CE16, RT1-CE10, RT1-A3	165	23	18520	14.6403	0.959436	0.41383	19.5312
GOTERM_CC_DIRECT	GO:0005887~integral component of plasma membrane	16	0.0706028	0.0202366	SLC39A14, RET, CALY, LOC361914, RXFP3, SLC7A10, MFSD2A, SLC4A10, SSTR2, TMPRSS11E, SLC5A8, ABCC2, GPNMB, STEAP1, LCT, CEACAM1	165	942	18520	1.90645	0.975786	0.412305	22.2977
GOTERM_CC_DIRECT	GO:0043025~neuronal cell body	11	0.0485394	0.022198	CNKSR2, SLC4A10, RET, CPLX1, PPP1R1B, UCHL1, SLC7A10, DPP6, NQO1, ELAVL4, ASL	165	540	18520	2.28642	0.983186	0.399922	24.1957
GOTERM_CC_DIRECT	GO:0031526~brush border membrane	4	0.0176507	0.0260572	PLB1, ABCC2, CEACAM1, SLC34A3	165	72	18520	6.23569	0.991814	0.413698	27.8061
GOTERM_MF_DIRECT	GO:0042605~peptide antigen binding	4	0.0176507	0.00428596	RT1-CE16, RT1-DB1, RT1-CE10, RT1-BA	149	37	16650	12.0805	0.749186	0.749186	5.63647
GOTERM_MF_DIRECT	GO:0020037~heme binding	6	0.026476	0.016429	CYP11A1, PTGS2, CYP2F4, CYP26B1, MPO, CYP2C11	149	166	16650	4.03897	0.995176	0.930543	20.0487
GOTERM_MF_DIRECT	GO:0015297~antiporter activity	3	0.013238	0.0205957	SLC4A10, LOC361914, SLC7A10	149	25	16650	13.4094	0.99877	0.892868	24.5043
GOTERM_MF_DIRECT	GO:0003777~microtubule motor activity	4	0.0176507	0.0217928	KIFC1, KIF2C, DNAH9, KIF20B	149	67	16650	6.67134	0.999171	0.830299	25.7412
GOTERM_MF_DIRECT	GO:0016491~oxidoreductase activity	5	0.0220634	0.0267336	AKR1B8, AKR1B7, HR, CYP2C11, ADH6A	149	127	16650	4.39941	0.999838	0.825368	30.6504
GOTERM_MF_DIRECT	GO:0042803~protein homodimerization activity	14	0.0617774	0.0272971	PTGS2, GJC3, NTSR2, GDNF, CITED1, APOA4, GSTM1, MAT1A, KIF20B, NPPC, CAMK2B, GALE, THRSP, CEACAM1	149	805	16650	1.94339	0.999865	0.773567	31.1907
DEmRNA, differentially expressed mRNA.
